# Supplementary material for: Competition between histamine-like and poly-imidazole coordination sites for Cu2+ and Zn2+ ions in zebra-fish peptide of prion-like protein
Source: Royal Society of Chemistry journal article supplement (doi:10.1039/c0dt00137f), 2010-01-01
Supplement: c0dt00137f.pdf [file c0dt00137f.pdf]

**“Competition between histamine-like and poli-imidazole coordination sites for Cu<sup>2+</sup> and Zn<sup>2+</sup> ions in zebra-fish peptide of prion-like protein”**

Caterina Migliorini, Danuta Witkowska, Daniela Valensin, Wojciech Kamysz and Henryk Kozlowski

SUPPLEMENTARY INFORMATION

| <b>Table 1S. <sup>1</sup>H chemical shift (ppm) of zf74-86 1.0 mM, pH 7.5, T=298K in D<sub>2</sub>O</b> |                                 |                            |                             |                                      |
|---------------------------------------------------------------------------------------------------------|---------------------------------|----------------------------|-----------------------------|--------------------------------------|
|                                                                                                         | <b>H<math>\alpha</math></b>     | <b>H<math>\beta</math></b> | <b>H<math>\gamma</math></b> | <b>others</b>                        |
| <b>His 74</b>                                                                                           | 3.95                            | 3.03                       |                             | H $\epsilon$ 7.72<br>H $\delta$ 6.98 |
| <b>Thr 75,78,81</b>                                                                                     | 4.33                            | 4.22                       | 1.16                        |                                      |
| <b>Gly 76,79,82,85</b>                                                                                  | 4.02<br>3.95<br>~3.92<br>~ 3.88 |                            |                             |                                      |
| <b>His 86</b>                                                                                           | 4.58                            | 3.11-3.04                  |                             | H $\epsilon$ 7.75<br>H $\delta$ 6.97 |
| <b>His 77*</b>                                                                                          | 4.70                            | 3.10                       |                             | H $\epsilon$ 7.72<br>H $\delta$ 6.96 |
| <b>His 80*</b>                                                                                          | 4.70                            | 3.07                       |                             | H $\epsilon$ 7.69<br>H $\delta$ 6.95 |
| <b>Ser 83</b>                                                                                           | 4.52                            | 3.92-3.86                  |                             |                                      |
| <b>Ser 84</b>                                                                                           | 4.49                            | 3.89                       |                             |                                      |

The \*label indicates that the assignment of His 77 and His 80 can be also exchanged

**Table 2S.**  $^{13}\text{C}$  chemical shift (ppm) of zf74-86 1.0 mM, pH 7.5, T=298K, in  $\text{D}_2\text{O}$

|                        | <b>C<math>\alpha</math></b> | <b>C<math>\beta</math></b> | <b>C<math>\gamma</math></b> | <b>others</b>                            |
|------------------------|-----------------------------|----------------------------|-----------------------------|------------------------------------------|
| <b>His 74</b>          | 54.2                        | 30.8                       |                             | C $\epsilon$ 136.07<br>C $\delta$ 116.90 |
| <b>Thr 75,78,81</b>    | 59.13                       | 66.85                      | 18.4                        |                                          |
| <b>Gly 76,79,82,85</b> | 42.4                        |                            |                             |                                          |
| <b>His 86</b>          | 53.3                        | 28.6                       |                             | C $\epsilon$ 136.07<br>C $\delta$ 116.90 |
| <b>His 77,80</b>       | 53.8                        | 28.6                       |                             | C $\epsilon$ 136.07<br>C $\delta$ 116.90 |
| <b>Ser 83</b>          | 55.4                        | 60.94                      |                             |                                          |
| <b>Ser 84</b>          | 55.8                        | 60.86                      |                             |                                          |

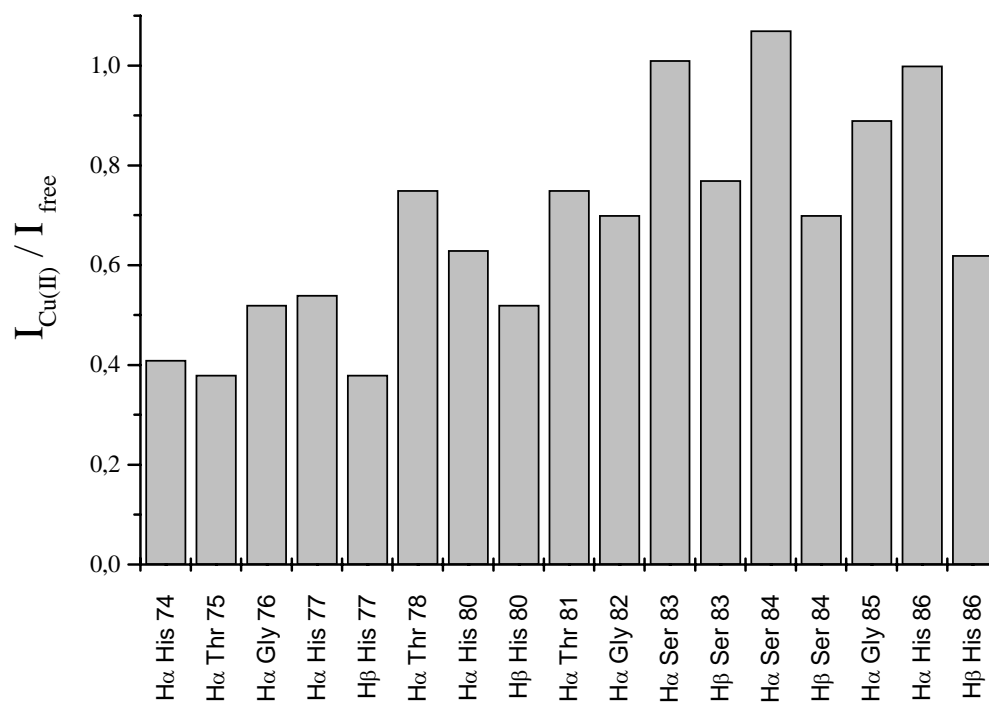

Figure 1S. Intensity reduction of  $^1\text{H}$ - $^1\text{H}$  TOCSY cross-peaks of zf74-86 1.0 mM solutions induced by 0.3 eqs. of  $\text{Cu}^{2+}$  pH 3.3, T=298.

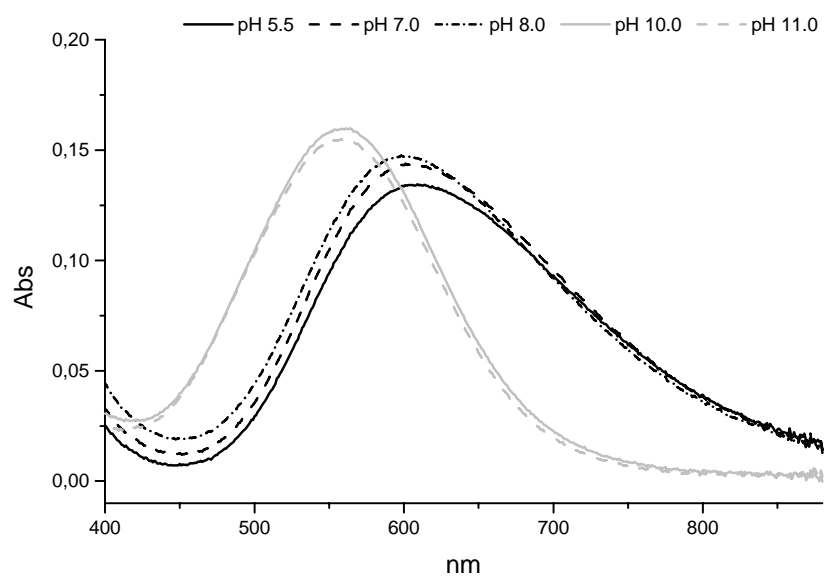

Figure 2S. UV-Vis spectra of Cu<sup>2+</sup>-zf74-86 complexes at different pH. Metal to ligand ratio=1:1.1.

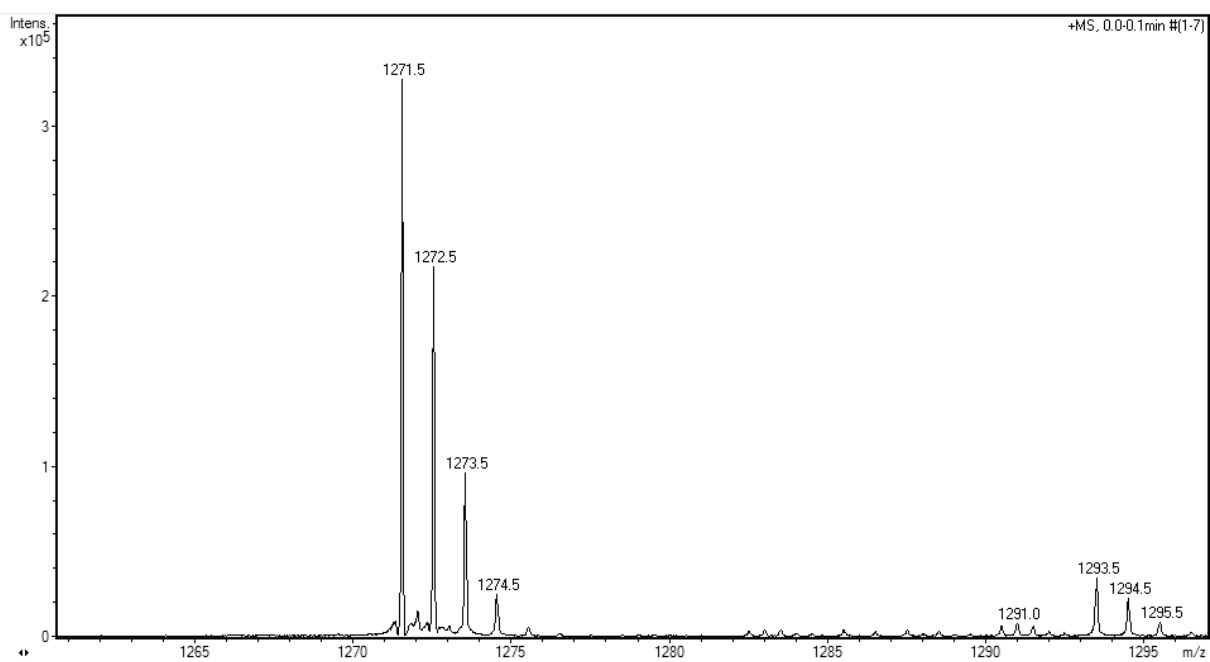

Figure 3S. ESI-MS spectra of zf74-86 in positive mode.
